# Supplementary material
Source: HighWire-hosted journal article supplement (https://www.cmajopen.ca/highwire/filestream/90599/field_highwire_adjunct_files/0/open-2022-0235-1-at.pdf)
Supplement: open-2022-0235-1-at.pdf [file open-2022-0235-1-at.pdf]

## Appendix 1: Supplementary material

### Supplementary Table S1. EMR systems and provinces included the national CPCSSN database

De-identified data are extracted from the following EMR systems across Canada:

- Accuro
- Healthquest
- InputHealth
- Intrahealth
- Med Access
- Medesync
- MYLE
- OSCAR
- P&P
- Practice Solutions
- Purkinje
- Wolf

Number of practice sites by region/province:

- British Columbia: 20
- Alberta: 54
- Manitoba: 48
- Ontario: 114
- Quebec: 11
- Atlantic provinces: 7

## Supplementary Figure S1. Data Flow Diagram

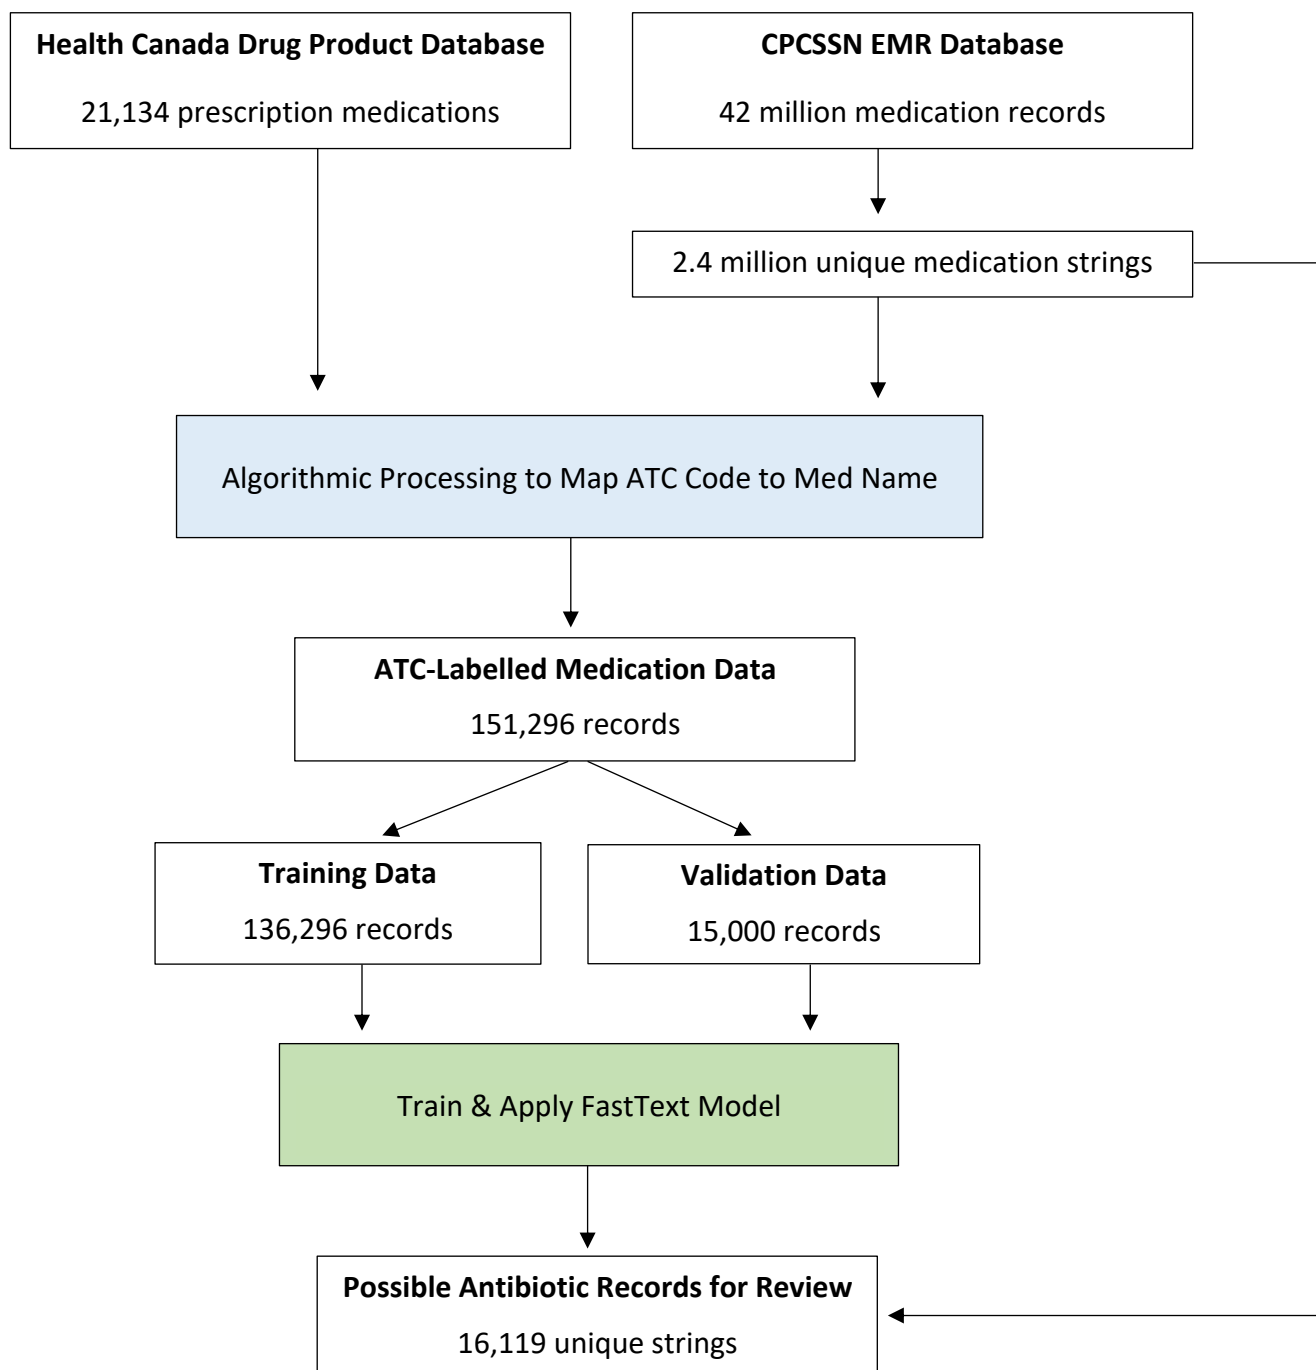

**Supplementary Table S2.** List of antibiotic-specific ATC codes.

| <u>ATC Code</u> | <u>Medication Name</u>              |
|-----------------|-------------------------------------|
| A01AB22         | Doxycycline                         |
| A01AB23         | Minocycline                         |
| A07AA02         | Nystatin                            |
| A07AA06         | Paromomycin                         |
| A07AA09         | Vancomycin                          |
| A07AA11         | Rifaximin                           |
| A07AA12         | Fidaxomicin                         |
| D06AA02         | Chlortetracycline                   |
| D06AA04         | Tetracycline                        |
| D06AX01         | Fusidic Acid                        |
| D06AX04         | Neomycin                            |
| D06AX05         | Bacitracin                          |
| D06AX07         | Gentamicin                          |
| D06AX09         | Mupirocin                           |
| D06AX13         | Retapamulin                         |
| D06AX14         | Ozenoxacin                          |
| D06AX30         | Combinations of Antibiotics         |
| D06AX55         | "Bacitracin, Combinations"          |
| D06BA01         | Silver Sulfadiazine                 |
| D06BA03         | Mafenide                            |
| D06BA51         | "Silver Sulfadiazine, Combinations" |
| D06BX01         | Metronidazole                       |
| D07CA01         | Hydrocortisone and Antibiotics      |
| D07CA02         | Methylprednisolone and Antibiotics  |
| D07CB01         | Triamcinolone and Antibiotics       |
| D07CB05         | Flumetasone and Antibiotics         |
| D07CC01         | Betamethasone and Antibiotics       |
| D07CC05         | Fluocinonide and Antibiotics        |
| D10AF01         | Clindamycin                         |
| D10AF51         | "Clindamycin, Combinations"         |
| D10AF52         | "Erythromycin, Combinations"        |
| D10AF53         | "Chloramphenicol, Combinations"     |
| G01AA01         | Nystatin                            |
| G01AA10         | Clindamycin                         |
| G01AA51         | "Nystatin, Combinations"            |
| G01AF01         | Metronidazole                       |
| J01AA01         | Demeclocycline                      |
| J01AA02         | Doxycycline                         |
| J01AA07         | Tetracycline                        |
| J01AA08         | Minocycline                         |
| J01AA09         | Rolitetracycline                    |
| J01AA12         | Tigecycline                         |
| J01BA01         | Chloramphenicol                     |
| J01CA01         | Ampicillin                          |
| J01CA02         | Pivampicillin                       |
| J01CA04         | Amoxicillin                         |
| J01CA06         | Bacampicillin                       |
| J01CA08         | Pivmecillinam                       |
| J01CA12         | Piperacillin                        |
| J01CA13         | Ticarcillin                         |
| J01CA51         | "Ampicillin, Combinations"          |
| J01CE01         | Benzylpenicillin                    |
| J01CE02         | Phenoxyethylpenicillin              |

Appendix 1, as supplied by the authors. Appendix to: Garies S, Taylor M, Boglarka B, et al. Using machine learning to standardize medication records in a pan-Canadian electronic medical record database: a data-driven algorithm study focused on antibiotics prescribed in primary care. *CMAJ Open* 2023. DOI:10.9778/cmajo.20220235. Copyright © 2023 The Author(s) or their employer(s).

To receive this resource in an accessible format, please contact us at [cmajgroup.cmaj.ca](mailto:cmajgroup.cmaj.ca).

|         |                                           |
|---------|-------------------------------------------|
| J01CE08 | Benzathine Benzylpenicillin               |
| J01CE09 | Procaine Penicillin                       |
| J01CE10 | Benzathine Phenoxymethylpenicillin        |
| J01CE30 | Combinations                              |
| J01CF   | Beta-Lactamase Resistant Penicillins      |
| J01CF02 | Cloxacillin                               |
| J01CF05 | Flucloxacillin                            |
| J01CR02 | Amoxicillin and Beta-Lactamase Inhibitor  |
| J01CR03 | Ticarcillin and Beta-Lactamase Inhibitor  |
| J01CR05 | Piperacillin and Beta-Lactamase Inhibitor |
| J01DB01 | Cefalexin                                 |
| J01DB03 | Cefalotin                                 |
| J01DB04 | Cefazolin                                 |
| J01DB05 | Cefadroxil                                |
| J01DC01 | Cefoxitin                                 |
| J01DC02 | Cefuroxime                                |
| J01DC03 | Cefamandole                               |
| J01DC04 | Cefaclor                                  |
| J01DC05 | Cefotetan                                 |
| J01DC10 | Cefprozil                                 |
| J01DD01 | Cefotaxime                                |
| J01DD02 | Ceftazidime                               |
| J01DD04 | Ceftriaxone                               |
| J01DD07 | Ceftizoxime                               |
| J01DD08 | Cefixime                                  |
| J01DD13 | Cefpodoxime                               |
| J01DE01 | Cefepime                                  |
| J01DF01 | Aztreonam                                 |
| J01DH02 | Meropenem                                 |
| J01DH03 | Ertapenem                                 |
| J01DH04 | Doripenem                                 |
| J01DH51 | Imipenem and Cilastatin                   |
| J01DI01 | Ceftobiprole Medocaril                    |
| J01DI54 | Ceftolozane and Beta-Lactamase Inhibitor  |
| J01EA01 | Trimethoprim                              |
| J01EB02 | Sulfamethizole                            |
| J01EB04 | Sulfapyridine                             |
| J01EB05 | Sulfafurazole                             |
| J01EC01 | Sulfamethoxazole                          |
| J01EC02 | Sulfadiazine                              |
| J01EE01 | Sulfamethoxazole and Trimethoprim         |
| J01EE02 | Sulfadiazine and Trimethoprim             |
| J01FA01 | Erythromycin                              |
| J01FA02 | Spiramycin                                |
| J01FA09 | Clarithromycin                            |
| J01FA10 | Azithromycin                              |
| J01FA15 | Telithromycin                             |
| J01FF01 | Clindamycin                               |
| J01FF02 | Lincomycin                                |
| J01FG02 | Quinopristin and Dalfopristin             |
| J01GA01 | Streptomycin                              |
| J01GB01 | Tobramycin                                |
| J01GB03 | Gentamicin                                |
| J01GB05 | Neomycin                                  |
| J01GB06 | Amikacin                                  |
| J01GB07 | Netilmicin                                |

|         |                                                                             |
|---------|-----------------------------------------------------------------------------|
| J01MA01 | Ofloxacin                                                                   |
| J01MA02 | Ciprofloxacin                                                               |
| J01MA06 | Norfloxacin                                                                 |
| J01MA11 | Grepafloxacin                                                               |
| J01MA12 | Levofloxacin                                                                |
| J01MA13 | Trovafloxacin                                                               |
| J01MA14 | Moxifloxacin                                                                |
| J01MA15 | Gemifloxacin                                                                |
| J01MA16 | Gatifloxacin                                                                |
| J01MB02 | Nalidixic Acid                                                              |
| J01RA02 | "Sulfonamides, Combinations With Other Antibacterials (Excl. Trimethoprim)" |
| J01XA01 | Vancomycin                                                                  |
| J01XA03 | Telavancin                                                                  |
| J01XA04 | Dalbavancin                                                                 |
| J01XB01 | Colistin                                                                    |
| J01XB02 | Polymyxin B                                                                 |
| J01XC01 | Fusidic Acid                                                                |
| J01XD01 | Metronidazole                                                               |
| J01XE01 | Nitrofurantoin                                                              |
| J01XX01 | Fosfomycin                                                                  |
| J01XX04 | Spectinomycin                                                               |
| J01XX05 | Methenamine                                                                 |
| J01XX08 | Linezolid                                                                   |
| J01XX09 | Daptomycin                                                                  |
| J01XX10 | Bacitracin                                                                  |
| J01XX11 | Tedizolid                                                                   |
| J01XX55 | "Methenamine, Combinations"                                                 |
| J02AA01 | Amphotericin B                                                              |
| J04     | Antimycobacterials                                                          |
| J04AA02 | Sodium Aminosalicylate                                                      |
| J04AB01 | Cycloserine                                                                 |
| J04AB02 | Rifampicin                                                                  |
| J04AB04 | Rifabutin                                                                   |
| J04AB30 | Capreomycin                                                                 |
| J04AC01 | Isoniazid                                                                   |
| J04AC51 | "Isoniazid, Combinations"                                                   |
| J04AK01 | Pyrazinamide                                                                |
| J04AK02 | Ethambutol                                                                  |
| J04AM05 | "Rifampicin, Pyrazinamide and Isoniazid"                                    |
| J04BA01 | Clofazimine                                                                 |
| J04BA02 | Dapsone                                                                     |
| P01AB01 | Metronidazole                                                               |
| S01AA   | Antibiotics                                                                 |
| S01AA01 | Chloramphenicol                                                             |
| S01AA02 | Chlortetracycline                                                           |
| S01AA07 | Framycetin                                                                  |
| S01AA09 | Tetracycline                                                                |
| S01AA11 | Gentamicin                                                                  |
| S01AA12 | Tobramycin                                                                  |
| S01AA13 | Fusidic Acid                                                                |
| S01AA17 | Erythromycin                                                                |
| S01AA26 | Azithromycin                                                                |
| S01AA30 | Combinations of Different Antibiotics                                       |
| S01AB04 | Sulfacetamide                                                               |
| S01AB54 | "Sulfacetamide, Combinations"                                               |
| S01AE01 | Ofloxacin                                                                   |

Appendix 1, as supplied by the authors. Appendix to: Garies S, Taylor M, Boglarka B, et al. Using machine learning to standardize medication records in a pan-Canadian electronic medical record database: a data-driven algorithm study focused on antibiotics prescribed in primary care. *CMAJ Open* 2023. DOI:10.9778/cmajo.20220235. Copyright © 2023 The Author(s) or their employer(s).

To receive this resource in an accessible format, please contact us at [cmajgroup.cmaj.ca](mailto:cmajgroup.cmaj.ca).

|         |                                           |
|---------|-------------------------------------------|
| S01AE03 | Ciprofloxacin                             |
| S01AE06 | Gatifloxacin                              |
| S01AE07 | Moxifloxacin                              |
| S01AE08 | Besifloxacin                              |
| S01CA01 | Dexamethasone and Antiinfectives          |
| S01CA02 | Prednisolone and Antiinfectives           |
| S01CA03 | Hydrocortisone and Antiinfectives         |
| S01CA05 | Betamethasone and Antiinfectives          |
| S01CA07 | Fluorometholone and Antiinfectives        |
| S02AA01 | Chloramphenicol                           |
| S02AA14 | Gentamicin                                |
| S02AA30 | "Antiinfectives, Combinations"            |
| S02CA02 | Flumetasone and Antiinfectives            |
| S02CA03 | Hydrocortisone and Antiinfectives         |
| S02CA05 | Fluocinolone Acetonide and Antiinfectives |
| S02CA06 | Dexamethasone and Antiinfectives          |
| S03AA07 | Ciprofloxacin                             |
| S03AA30 | "Antiinfectives, Combinations"            |

ATC=Anatomical Therapeutic Chemical (classification system)
